# Supplementary material for: Development of Improved Spectrophotometric Assays for Biocatalytic Silyl Ether Hydrolysis
Source: MDPI journal article supplement (doi:10.3390/biom14040492), 2024-04-18
Supplement: s1 [file s1]

## **Supplementary Information**

### **Development of Improved Spectrophotometric Assays for Biocatalytic Silyl Ether Hydrolysis**

**Yuqing Lu** <sup>1,2,†</sup> **Chisom S. Egedezu** <sup>1,2,†</sup> **Peter G. Taylor** <sup>3</sup> and **Lu Shin Wong** <sup>1,2,\*</sup>

<sup>1</sup> Manchester Institute of Biotechnology, University of Manchester, Manchester

M1 7DN, UK; yuqing.lu-3@postgrad.manchester.ac.uk (Y.L.);

chisom.egedeuzu@manchester.ac.uk (C.S.E.)

<sup>2</sup> Department of Chemistry, University of Manchester, Manchester M13 9PL, UK

<sup>3</sup> School of Life Health and Chemical Sciences, Open University, Milton Keynes

MK7 6AA, UK; peter.taylor@open.ac.uk

\* Correspondence: l.s.wong@manchester.ac.uk

† These authors contributed equally to the work.

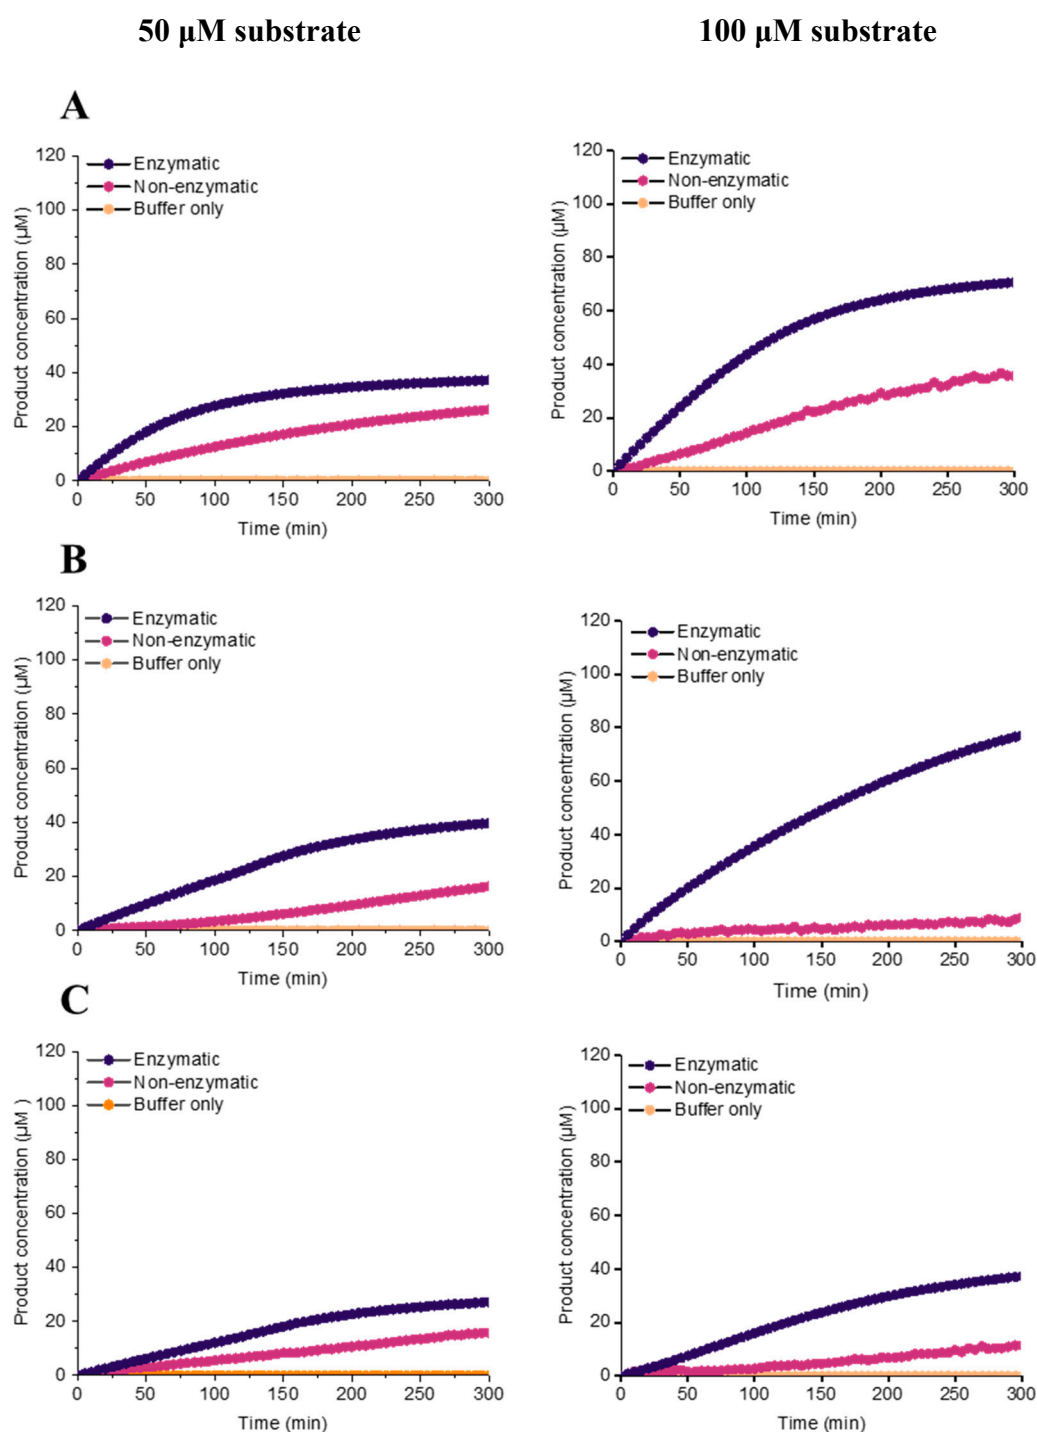

**Figure S1.** Graph of concentration of nitrophenolate produced against time for enzymatic and non-enzymatic hydrolysis measured at the  $\lambda_{\text{max}}$  of their corresponding 4-nitrophenolate ions. (A) substrate **1** at 405 nm, (B) substrate **4** at 414 nm, (C) substrate **5** at 394 nm, (D, next page) substrate **6** at 398 nm, (E) substrate **7** at 294 nm. Data were quantified using their corresponding calibration curves (Supporting Information Figures S4). Reactions were carried out with 6.7  $\mu\text{M}$  TF-Sil $\alpha$ -Strep, 50  $\mu\text{M}$  substrate (Left), 100  $\mu\text{M}$  substrate (Right), 10 % v/v 1,4-dioxane, 50 mM Tris buffer at the pH 8.5 and 100 mM NaCl.

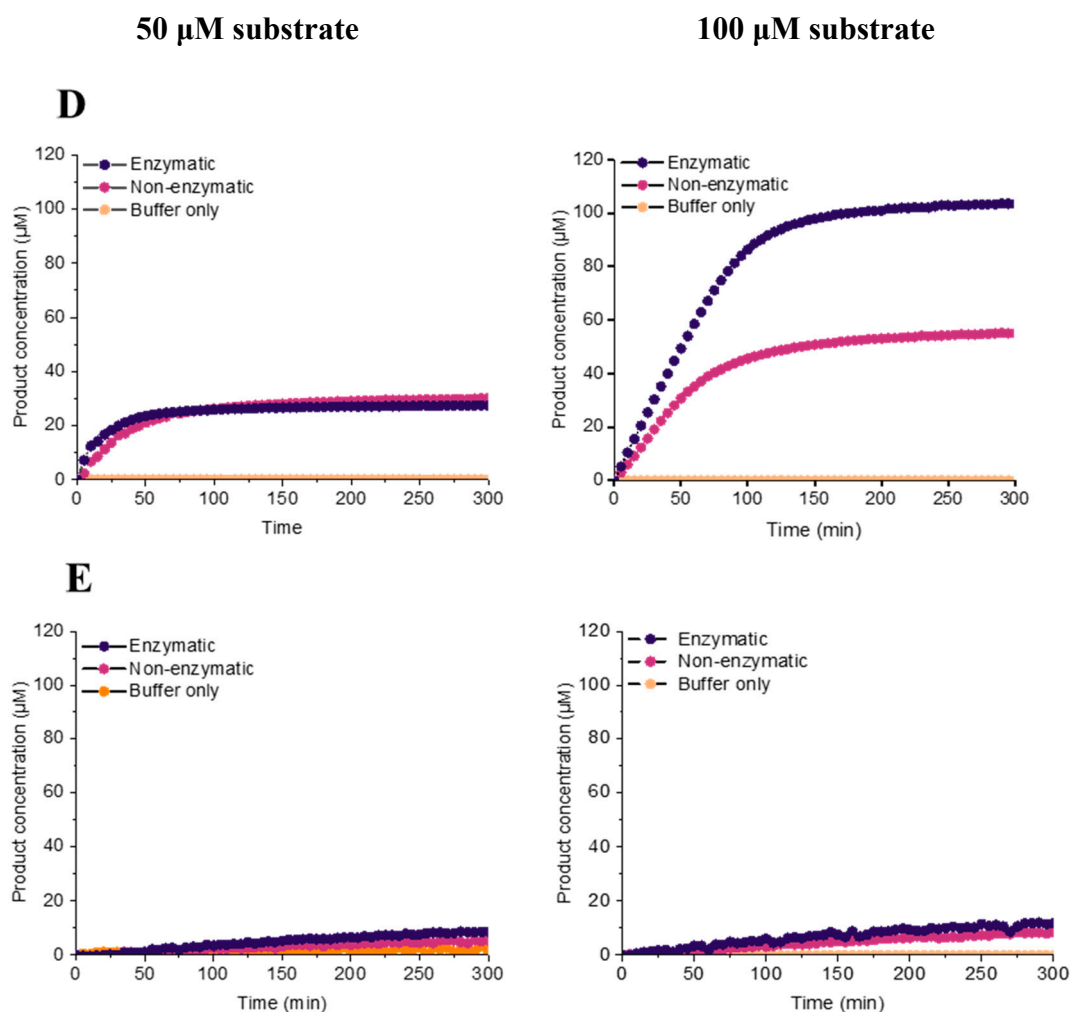

**Figure S1 (continued).** Graph of concentration of silanols produced showing enzymatic and non-enzymatic (background) hydrolysis measured at the  $\lambda_{\text{max}}$  of their corresponding 4-nitrophenolate ions after 300 min. Buffer only is used as the blank. (A) substrate **1** at 405 nm, (B) substrate **4** at 414 nm, (C) substrate **5** at 394 nm, (D, next page) substrate **6** at 398 nm, (E) substrate **7** at 294 nm. Data were quantified using their corresponding calibration curves (Supporting Information Figures S4). Reactions were carried out with 6.7  $\mu$ M TF-Sil $\alpha$ -Strep, 50  $\mu$ M substrate (Left), 100  $\mu$ M substrate (Right), 10 % v/v 1,4-dioxane, 50 mM Tris buffer at the pH 8.5 and 100 mM NaCl.

**Table S1.** Rates of enzymatic vs. background hydrolysis showing the initial rates and fold increase of enzyme-catalysed hydrolysis of different silyl ether substrates. Enzymatic reactions were carried out with 6.7  $\mu\text{M}$  TF-Sil $\alpha$ -Strep, 50 or 100  $\mu\text{M}$  substrate, 10 % v/v 1,4-dioxane, 50 mM Tris buffer at pH 8.5 and 100 mM NaCl.

| Substrate | Initial rate at 50 $\mu\text{M}$ substrate<br>( $\mu\text{M min}^{-1}$ ) |            |       | Fold<br>difference <sup>†</sup> | Initial rate at 100 $\mu\text{M}$ substrate<br>( $\mu\text{M min}^{-1}$ ) |            |      | Fold<br>difference <sup>†</sup> |
|-----------|--------------------------------------------------------------------------|------------|-------|---------------------------------|---------------------------------------------------------------------------|------------|------|---------------------------------|
|           | Enzymatic                                                                | Background | Net*  |                                 | Enzymatic                                                                 | Background | Net* |                                 |
| <b>1</b>  | 0.44                                                                     | 0.15       | 0.29  | 2.9                             | 0.80                                                                      | 0.37       | 0.43 | 2.2                             |
| <b>4</b>  | 0.19                                                                     | 0.03       | 0.16  | 6.2                             | 0.35                                                                      | 0.03       | 0.32 | 11.6                            |
| <b>5</b>  | 0.12                                                                     | 0.06       | 0.06  | 2.0                             | 0.14                                                                      | 0.05       | 0.09 | 2.8                             |
| <b>6</b>  | 0.72                                                                     | 0.54       | 0.18  | 1.3                             | 1.36                                                                      | 0.79       | 0.57 | 1.7                             |
| <b>7</b>  | 0.04                                                                     | 0.027      | 0.013 | 1.5                             | 0.04                                                                      | 0.03       | 0.01 | 1.3                             |

\*Net initial rate is measured as the difference in initial rate between the enzymatic and background hydrolysis.

<sup>†</sup>Fold difference (rate ratio) calculated as the ratio of the enzymatic reaction relative to background (non-enzymatic) reaction.

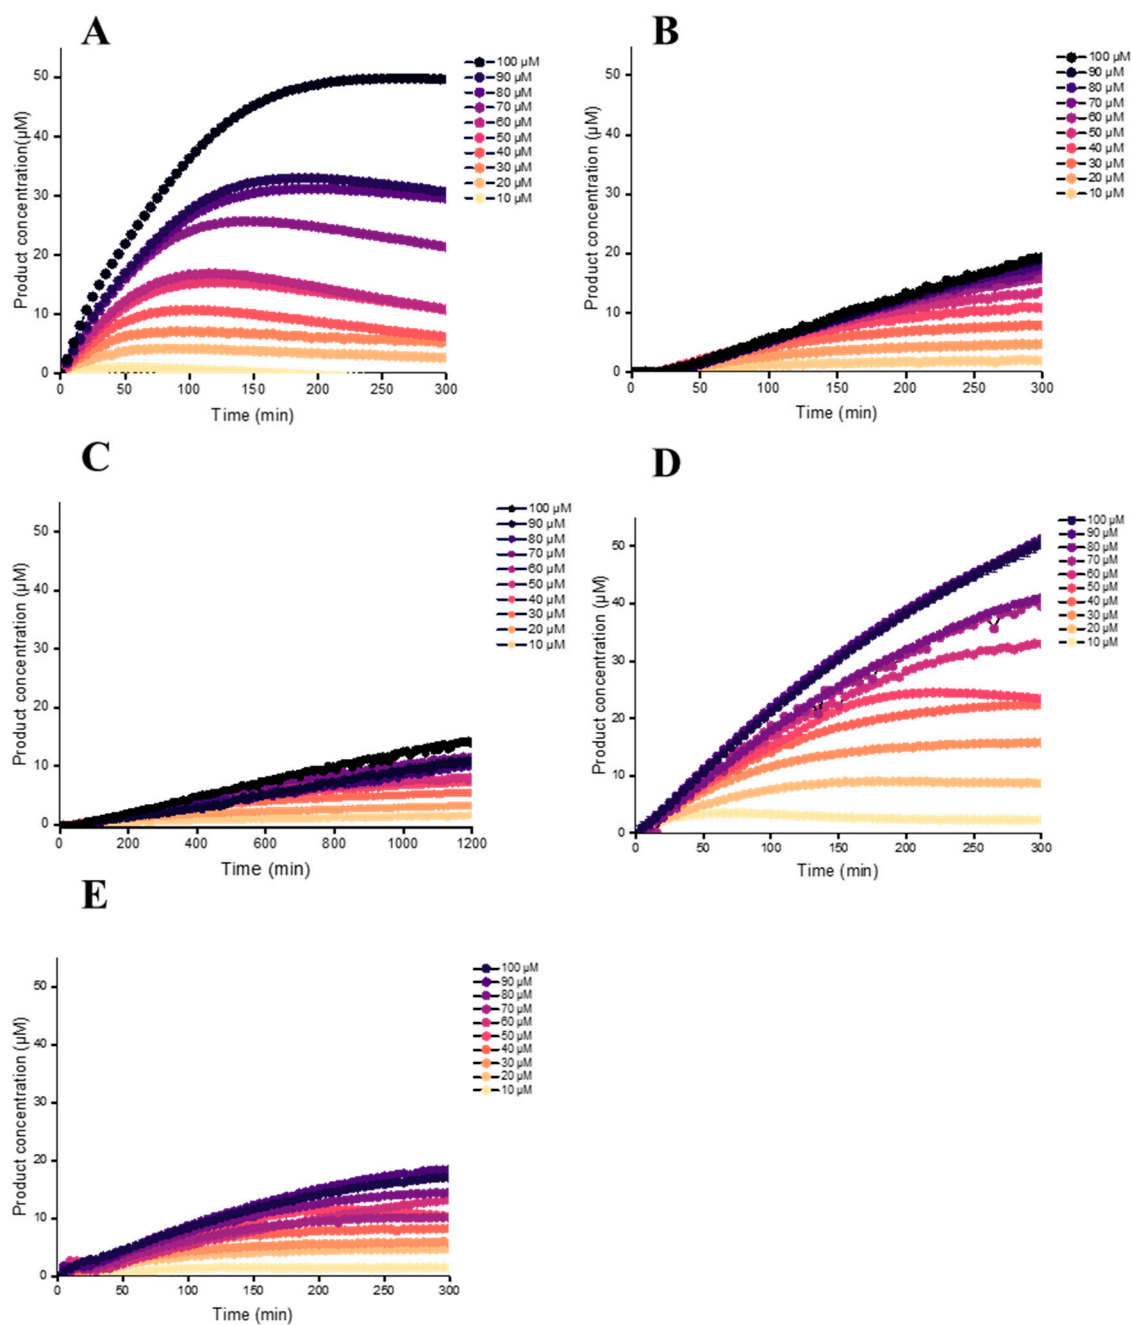

**Figure S2.** Graph of net concentration of corresponding phenoxide products measured by UV-Vis absorbance at their respective  $\lambda_{\text{max}}$ . Substrate **1** (A), **2** (B), and **3** (C) at 405 nm; **4** (D) at 414 nm and **5** (E) at 394 nm. Data were calibrated using data from Supporting Information Figures S4, and normalised with respect to the x- and y-axes.

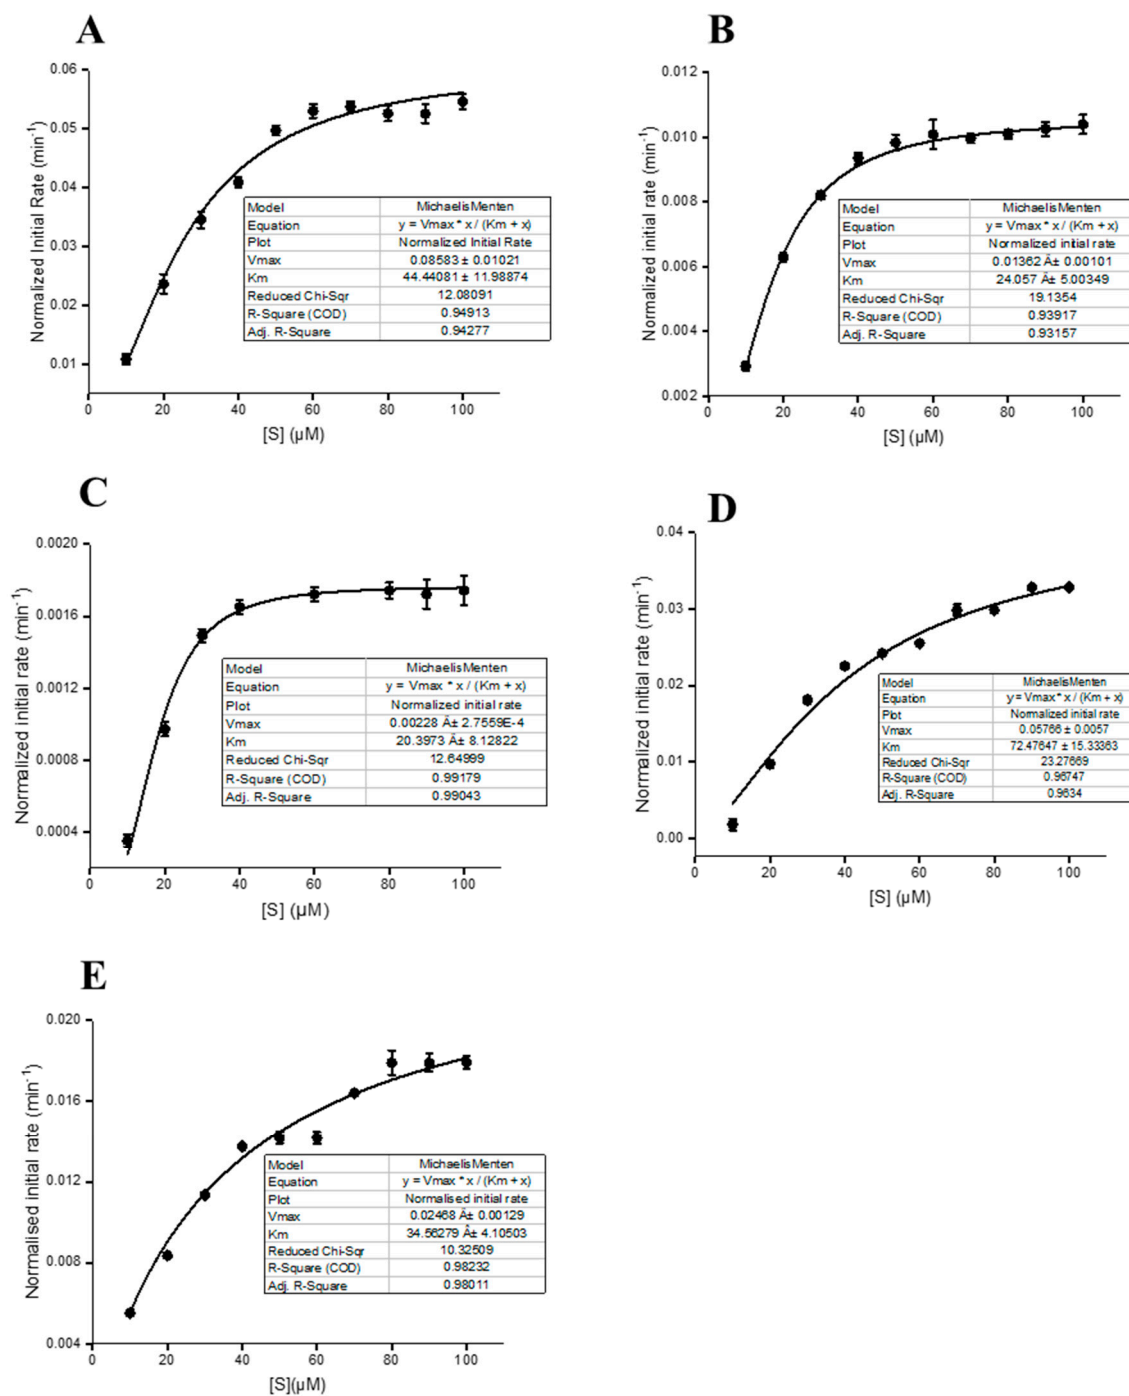

**Figure S3.** Graph of best fit Michaelis–Menten curves for the hydrolysis of silyl ether substrates by TF-Sil $\alpha$ -Strep against a range of substrate concentrations. Substrate **1** (A), **2** (B), **3** (C), **4** (D) and **5** (E).

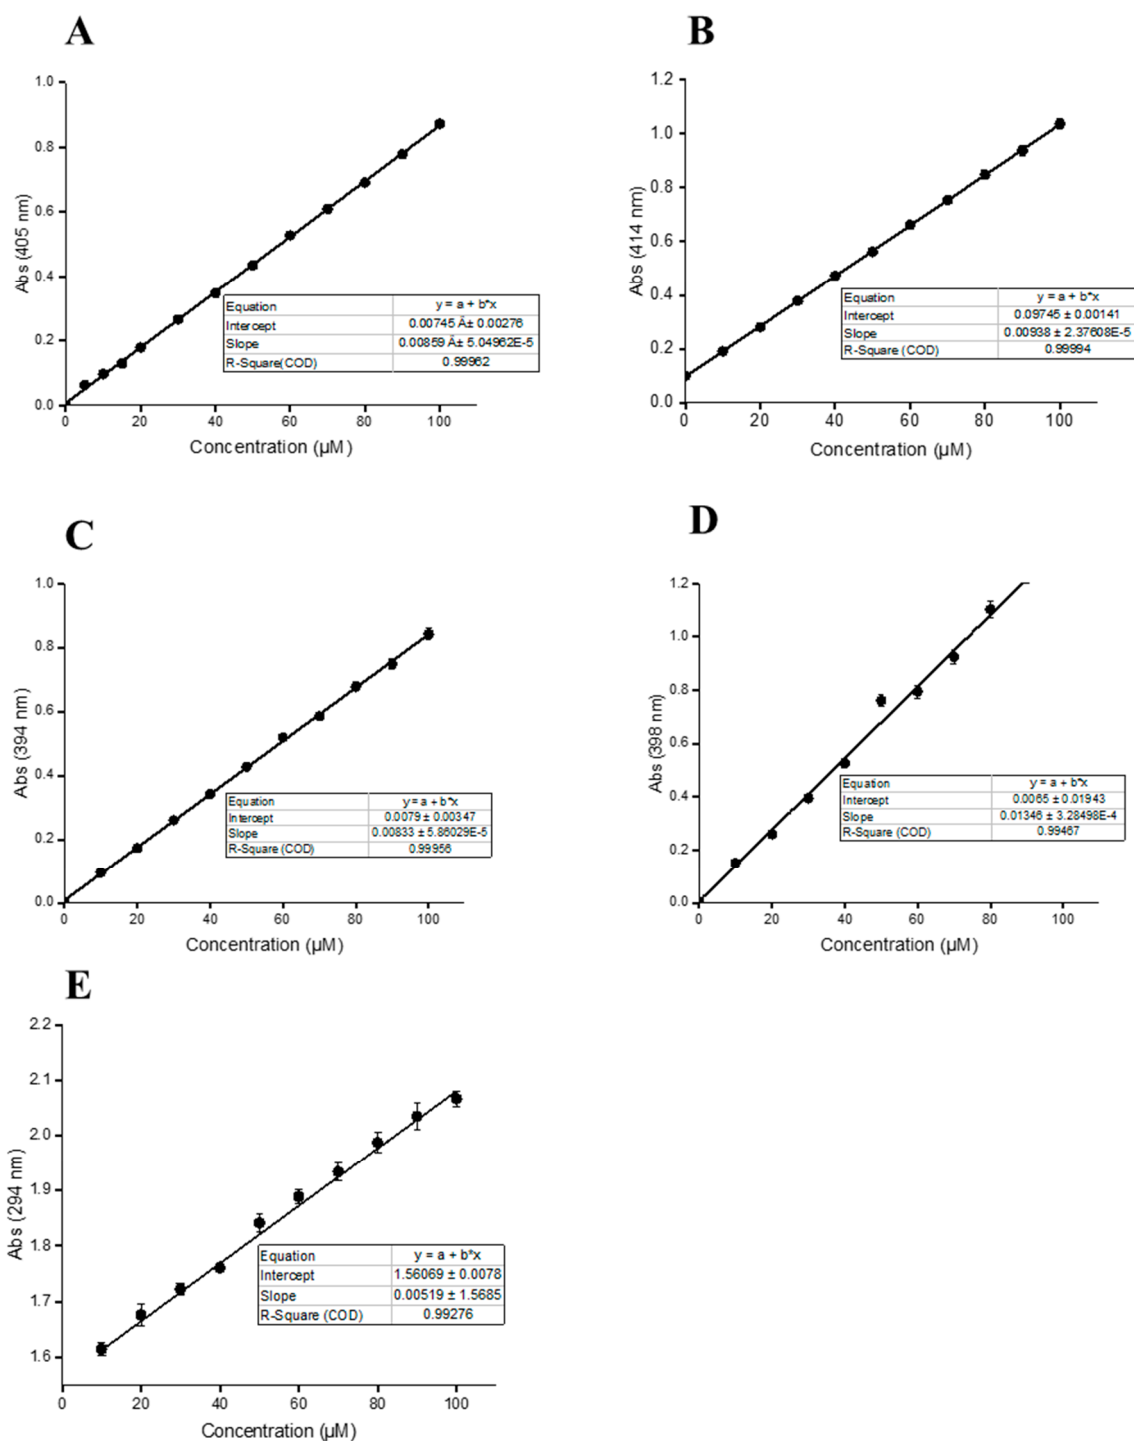

**Figure S4.** Calibration graph of UV-Vis absorption against concentration of (A) 4-nitrophenol for **1**, (B) 2-methyl-4-nitrophenol for **4**, (C) 3-methyl-4-nitrophenol for **5**, (D) 3-methoxy-4-nitrophenol for **6**, (E) 4-cyanophenol for **7**, in buffer (Tris (50 mM), NaCl (100 mM), pH 8.5, 10% (v/v) 1,4-dioxane).

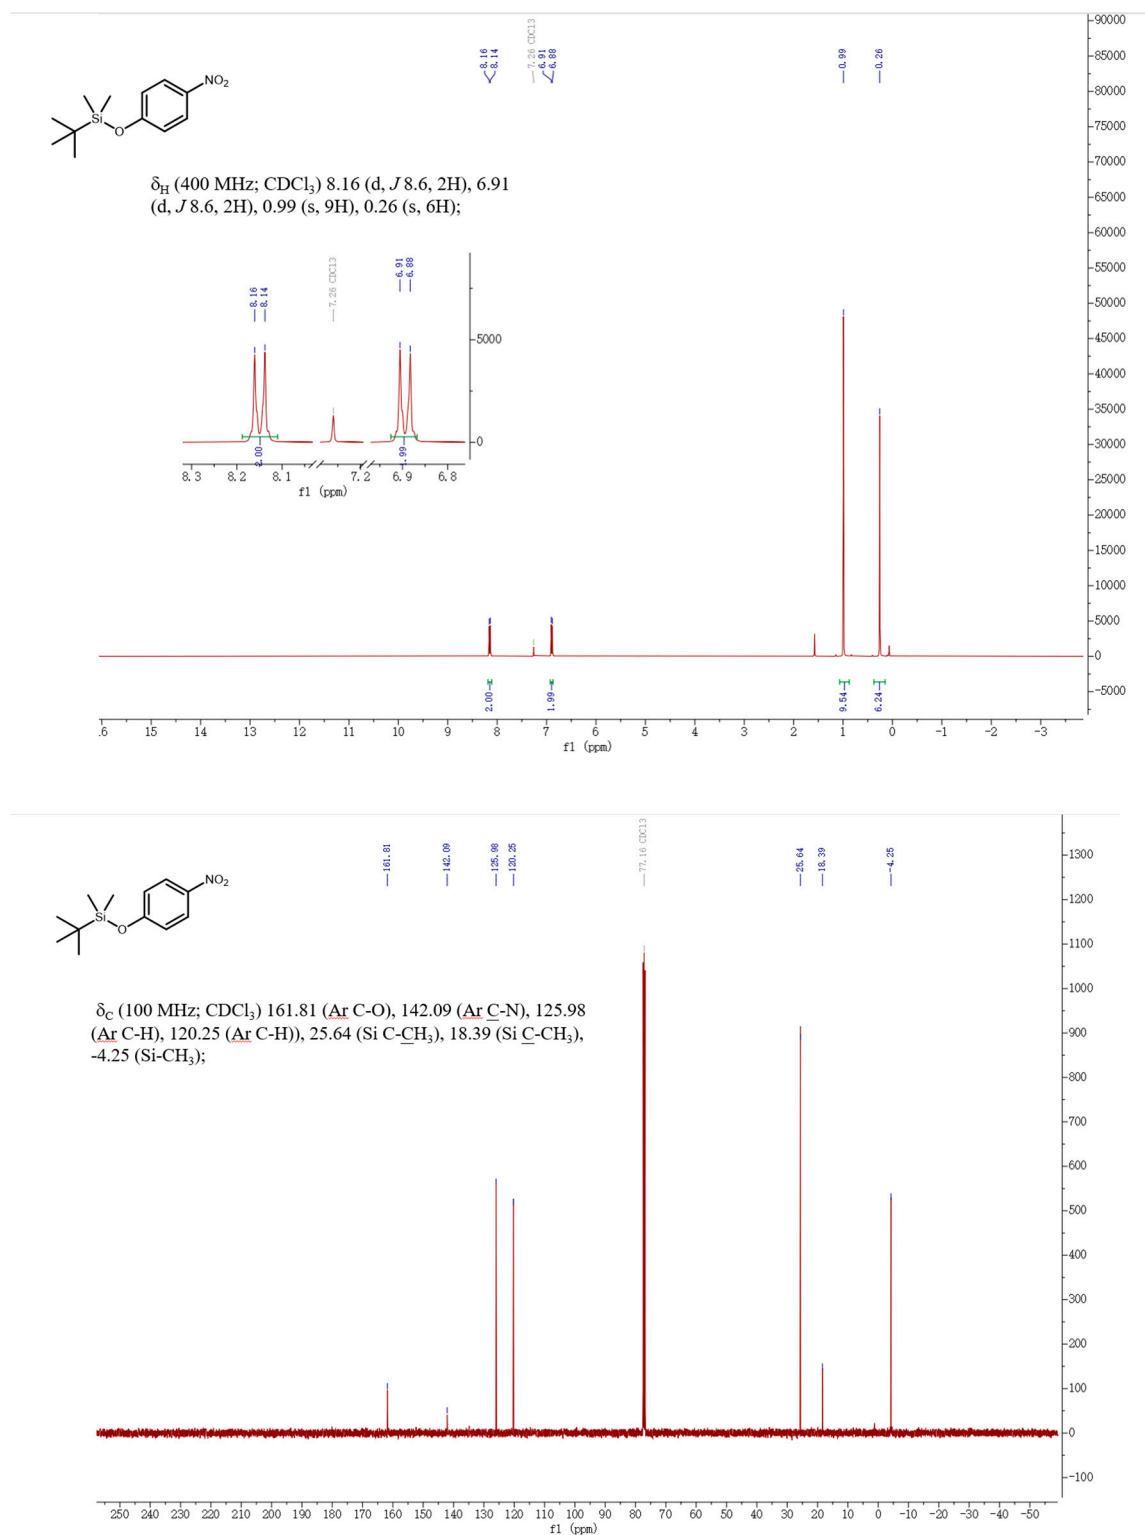

**Figure S5.** Calibrated NMR spectra for **1** showing  $^1\text{H}$  (**top**) and  $^{13}\text{C}$  (**bottom**) chemical shifts.



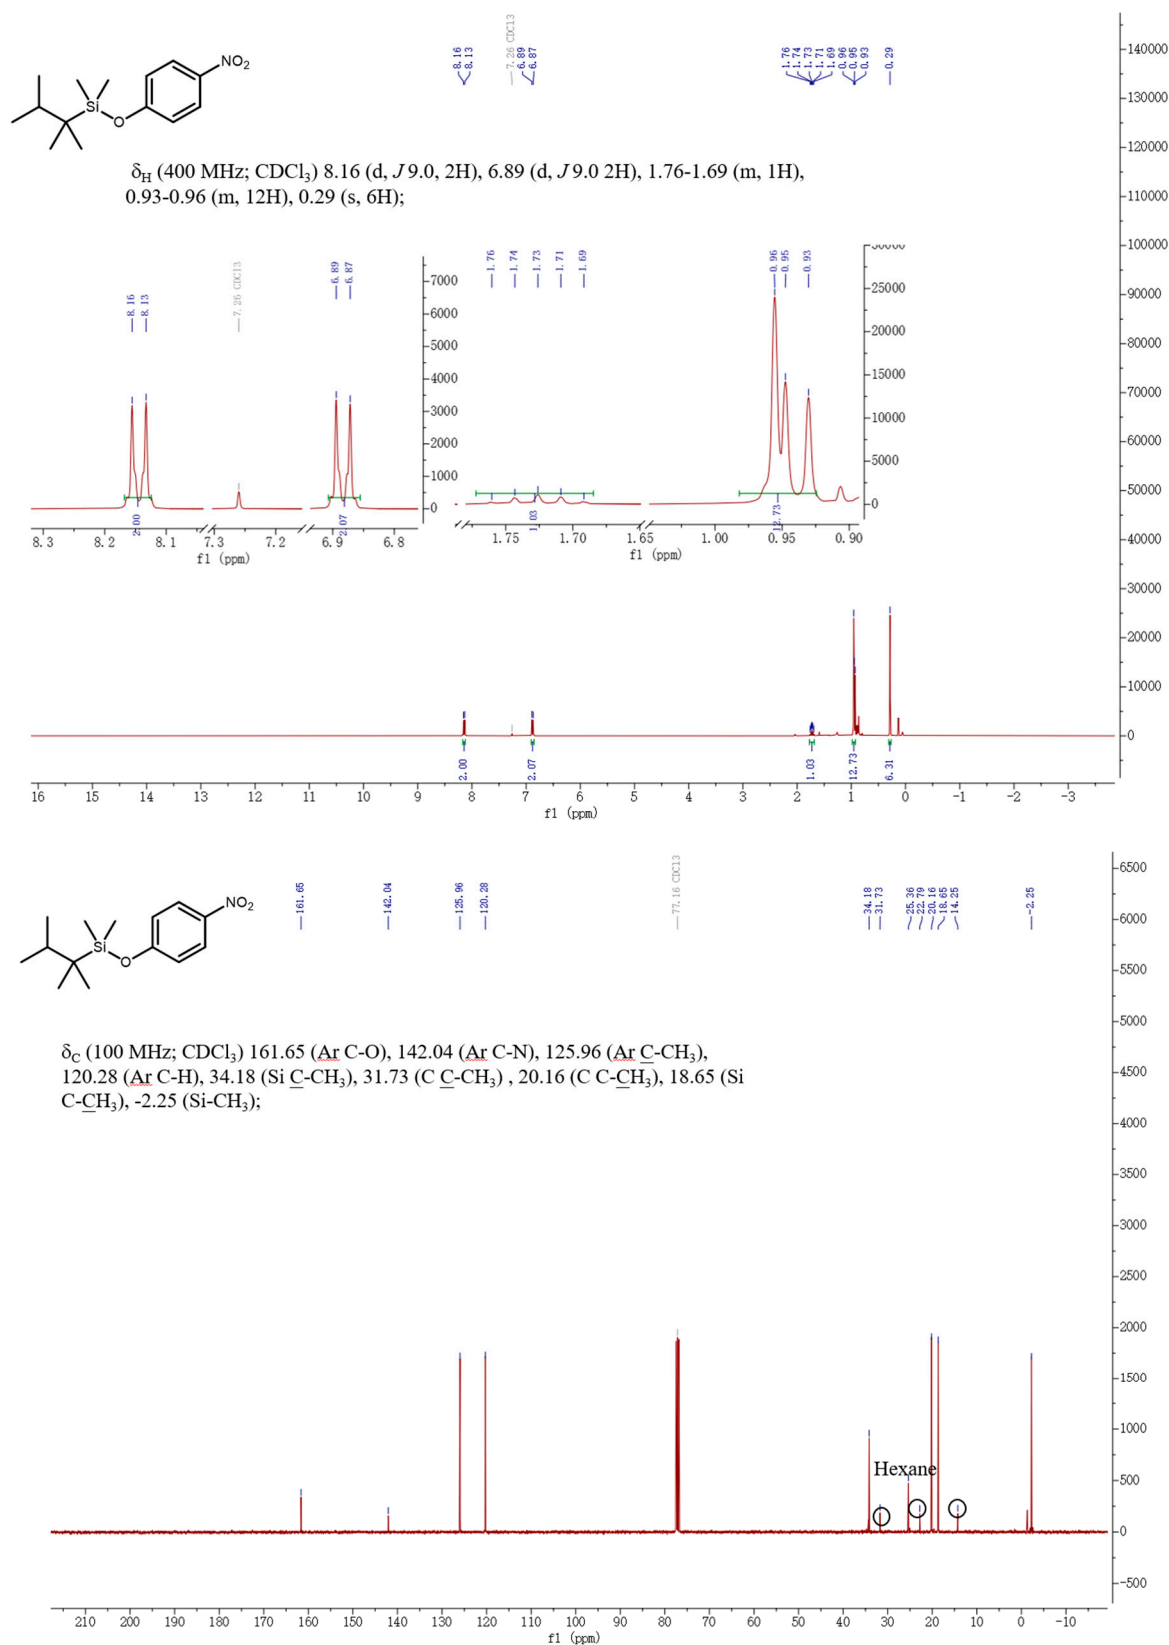

**Figure S6.** Calibrated NMR spectra for **2** showing <sup>1</sup>H (top) and <sup>13</sup>C (bottom) chemical shifts.

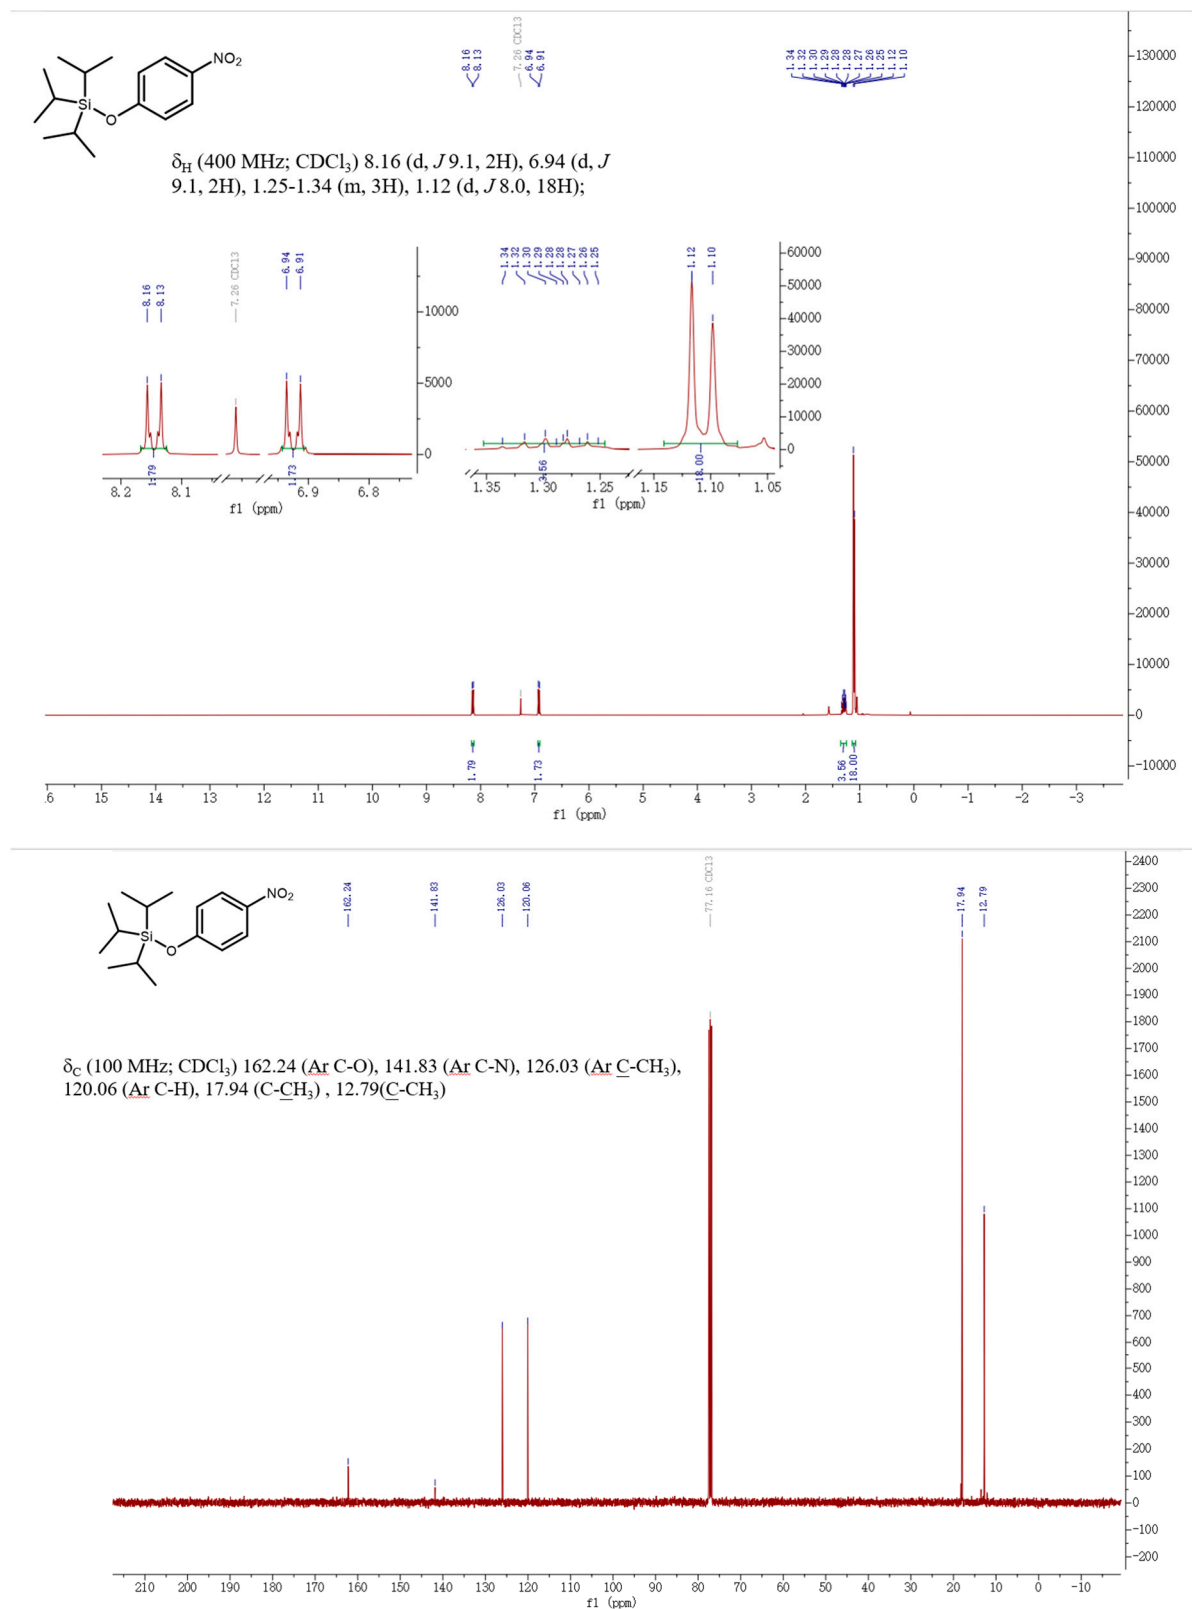

**Figure S7.** Calibrated NMR spectra for **3** showing  $^1H$  (top) and  $^{13}C$  (bottom) chemical shifts.

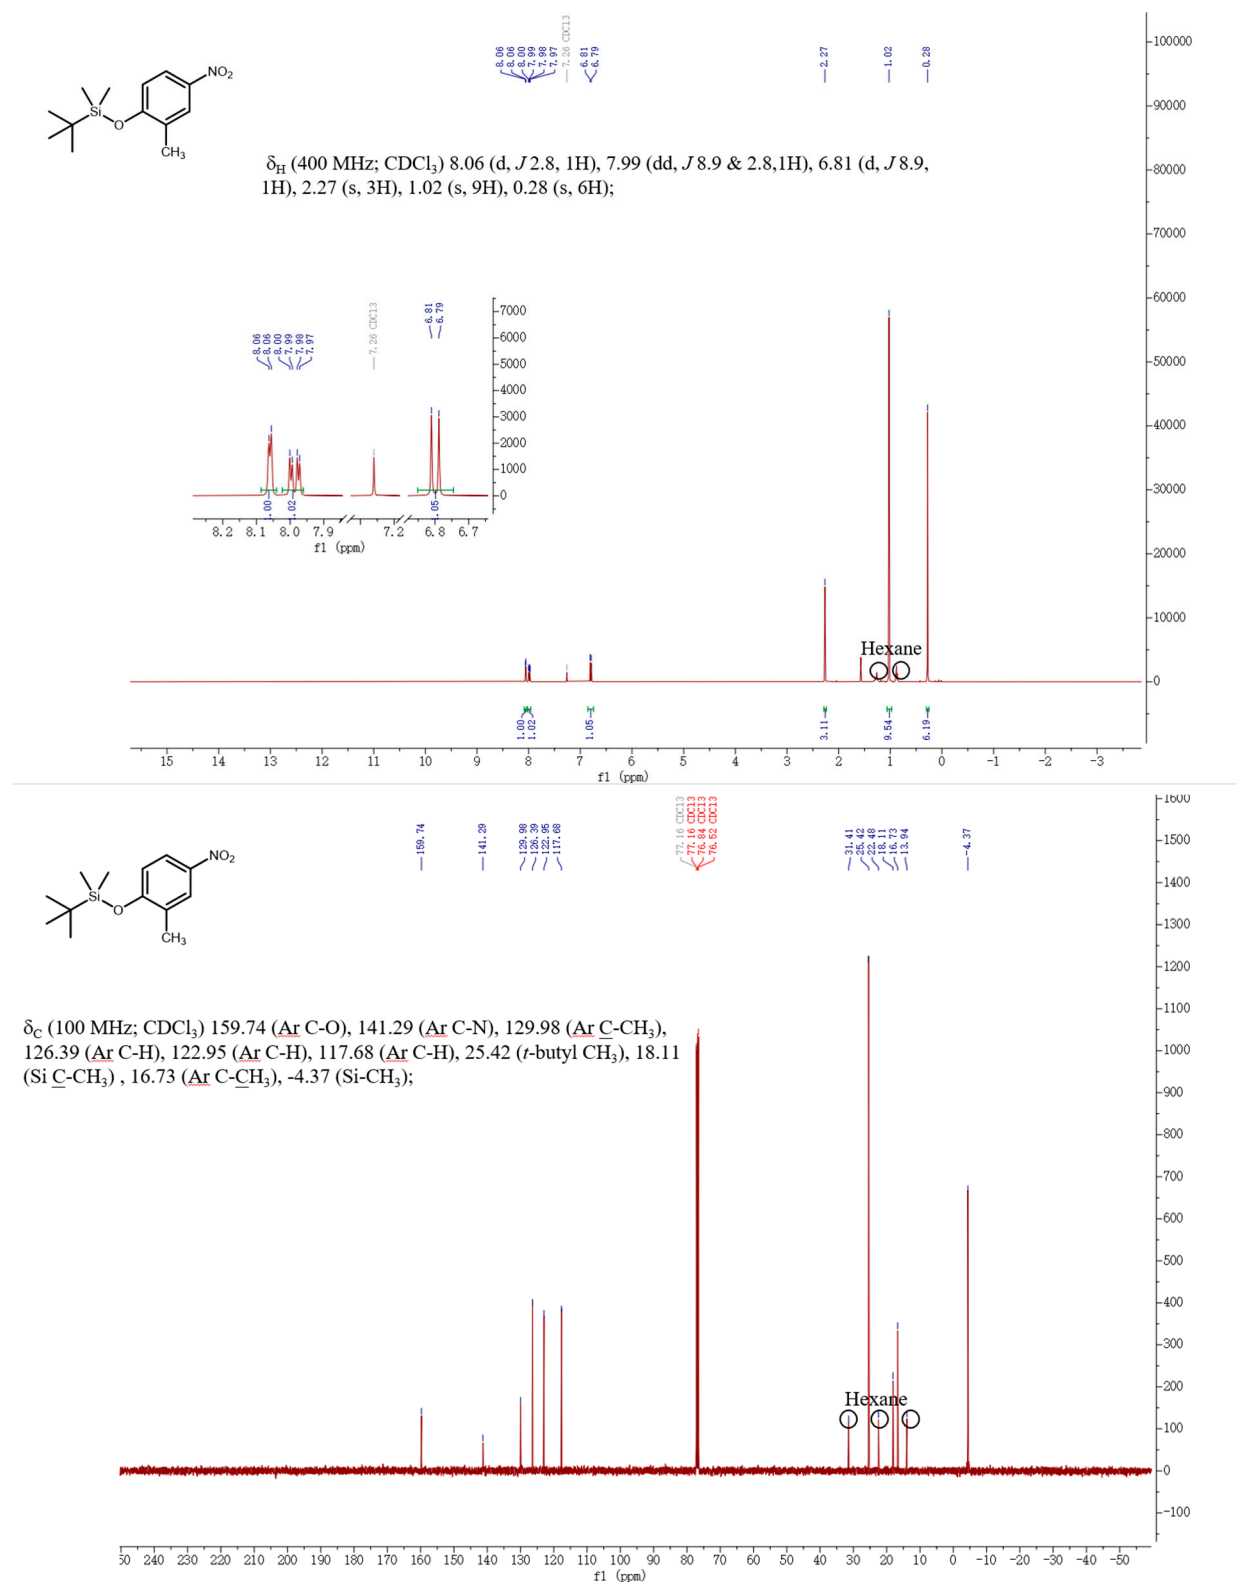

**Figure S8.** Calibrated NMR spectra for **4** showing <sup>1</sup>H (top) and <sup>13</sup>C (bottom) chemical shifts.



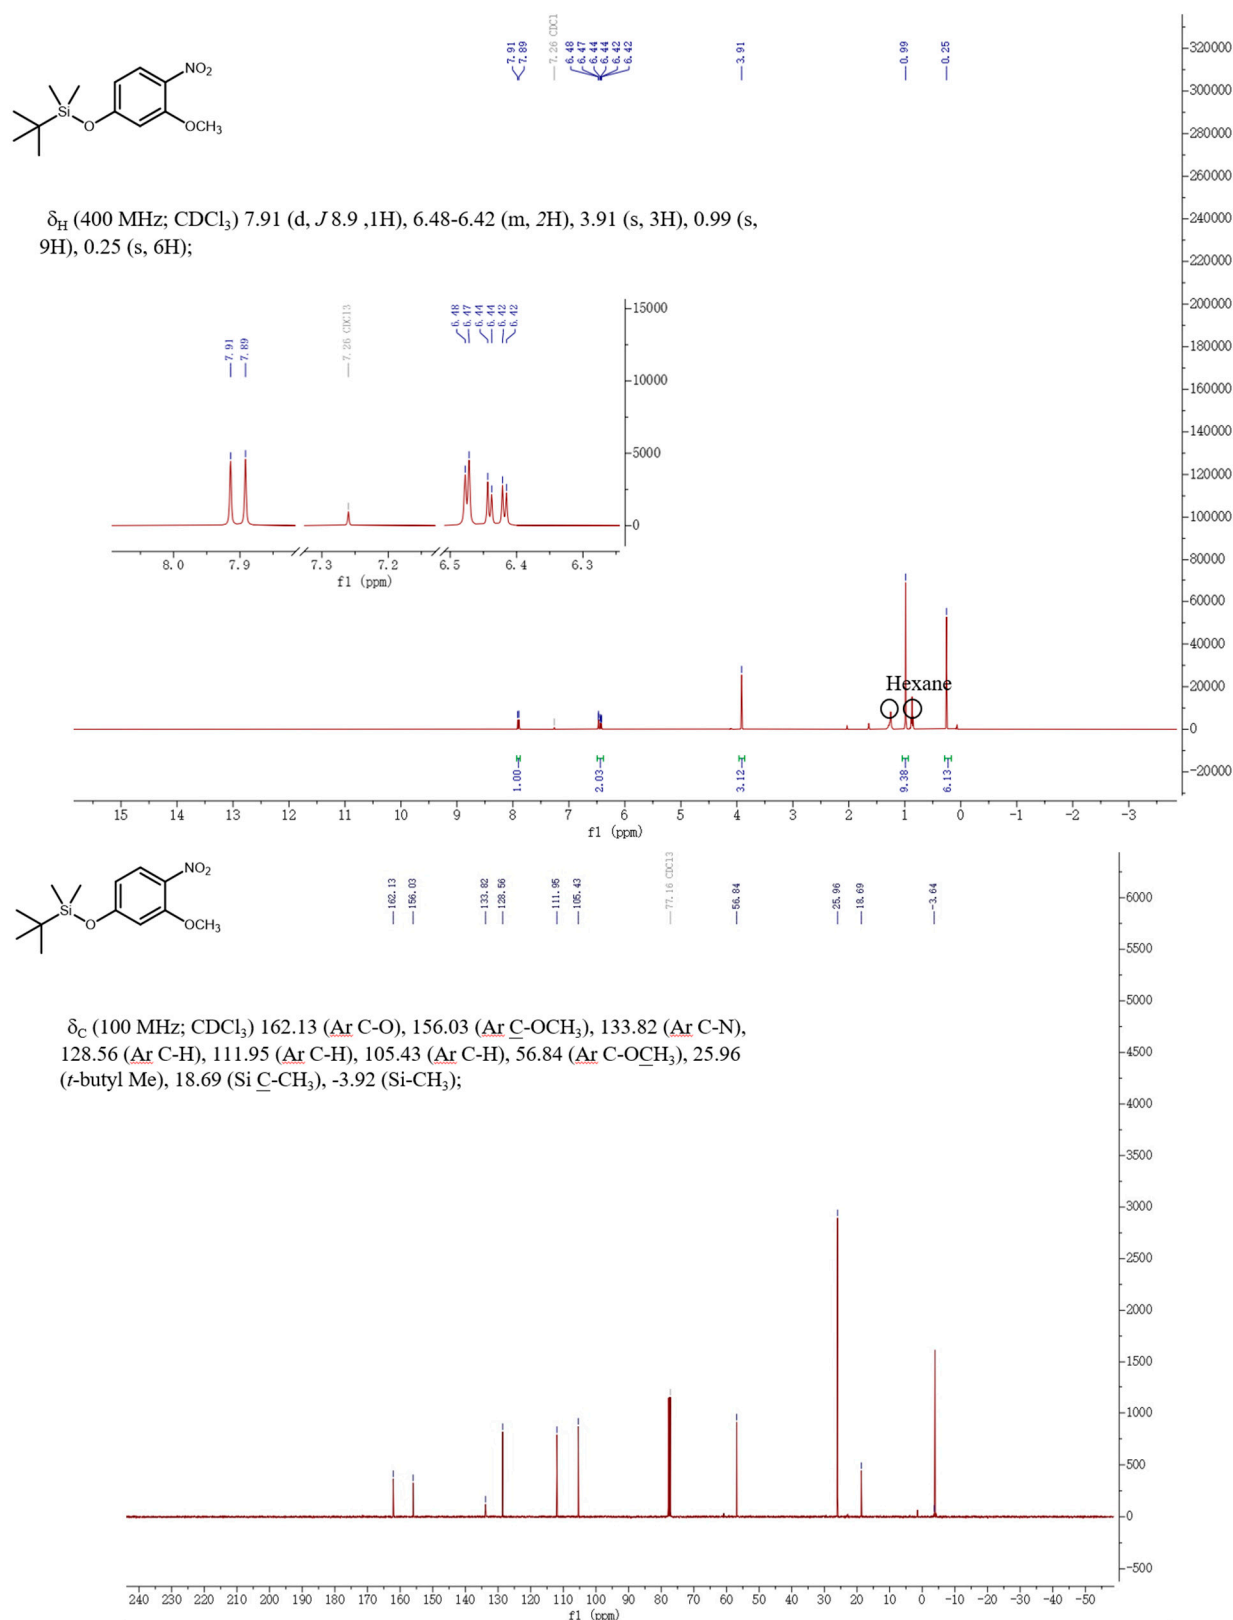

**Figure S10.** Calibrated NMR spectra for **6** showing <sup>1</sup>H (top) and <sup>13</sup>C (bottom) chemical shifts.

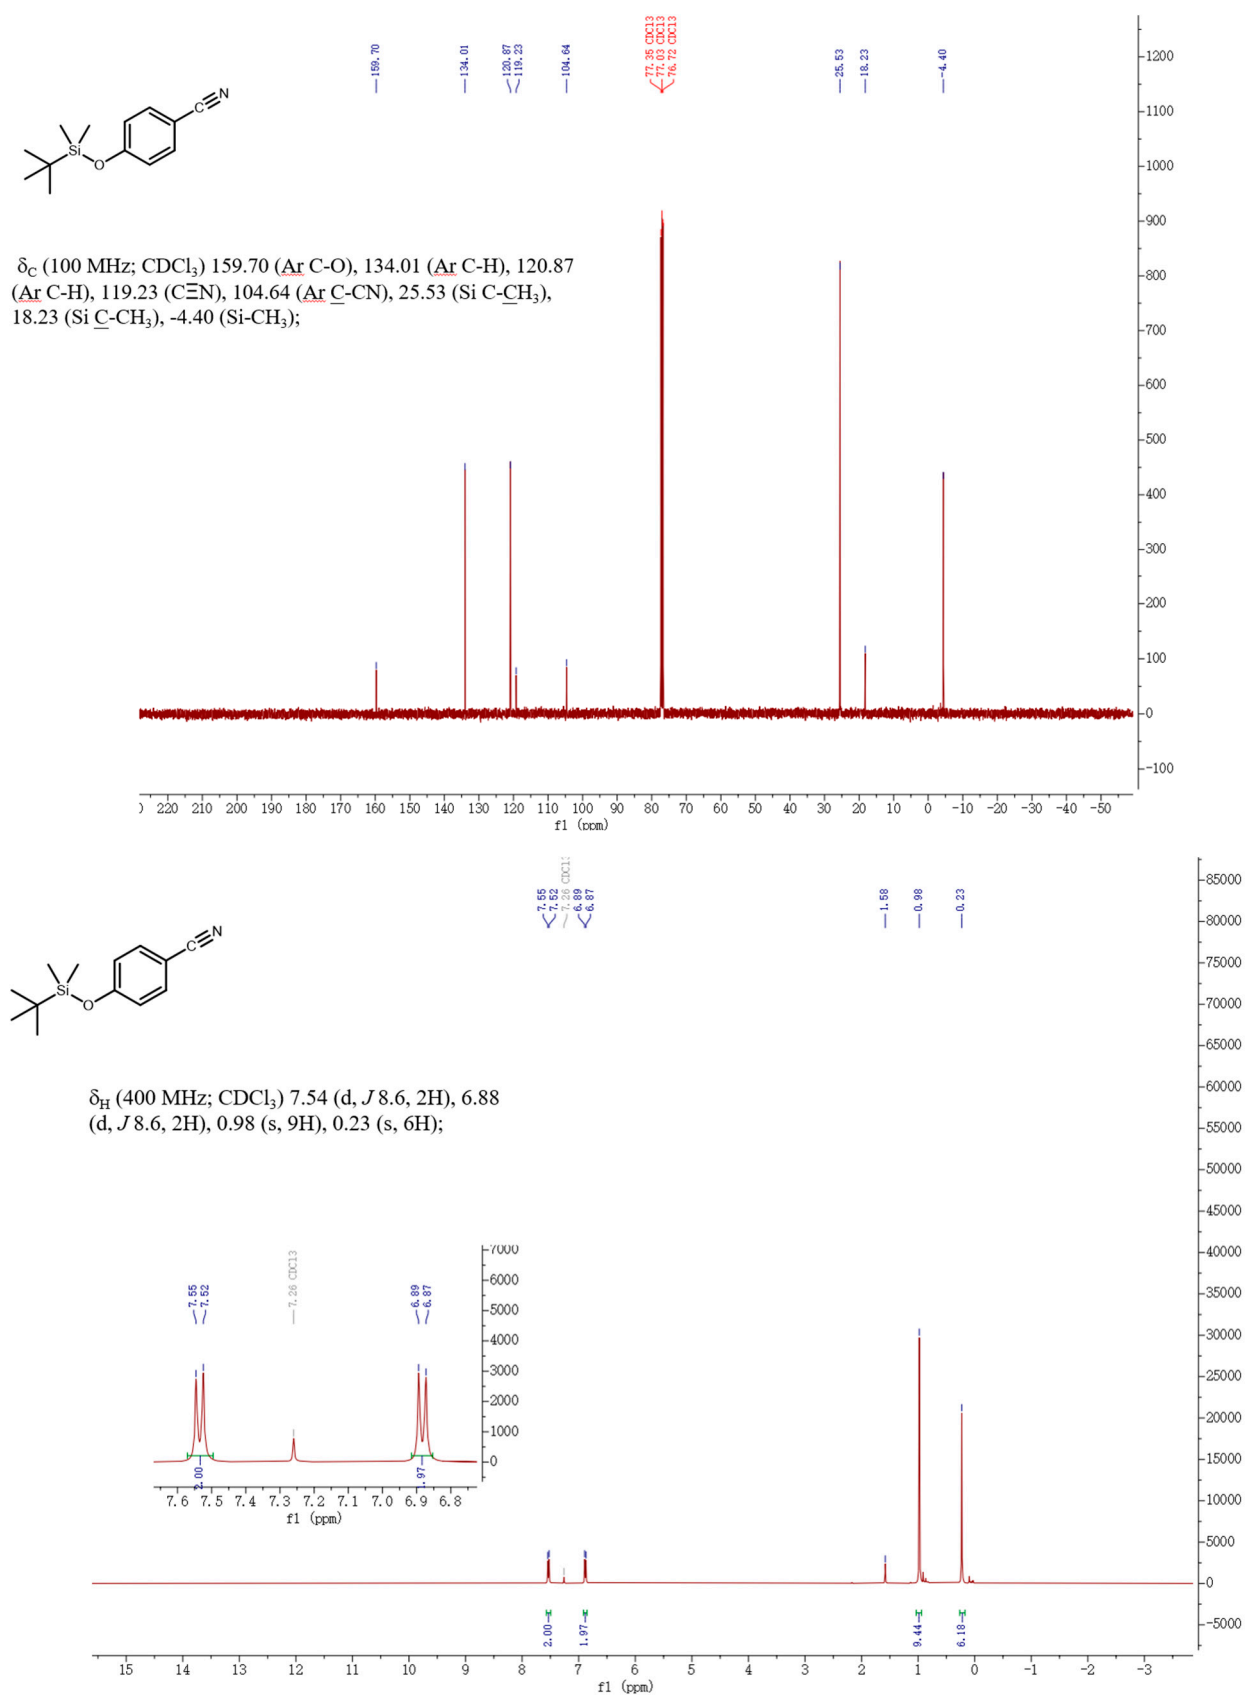

**Figure S11.** Calibrated NMR spectra for **7** showing  $^1H$  (top) and  $^{13}C$  (bottom) chemical shifts.

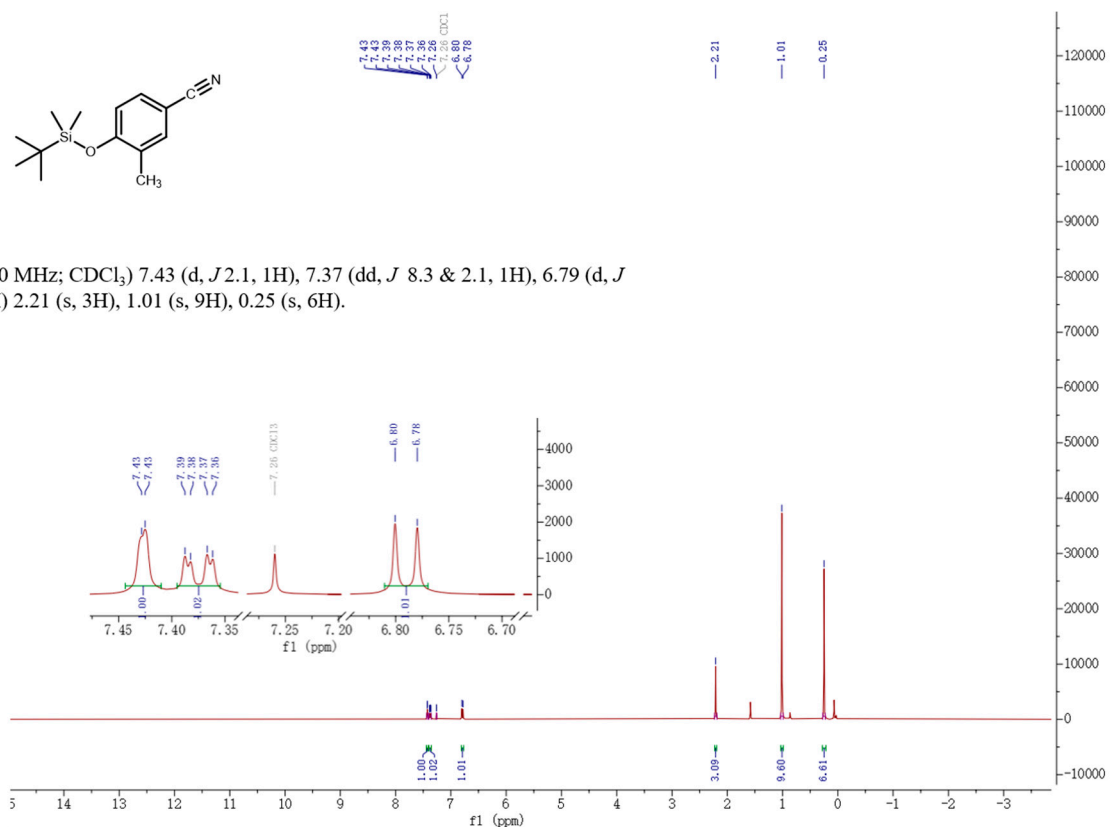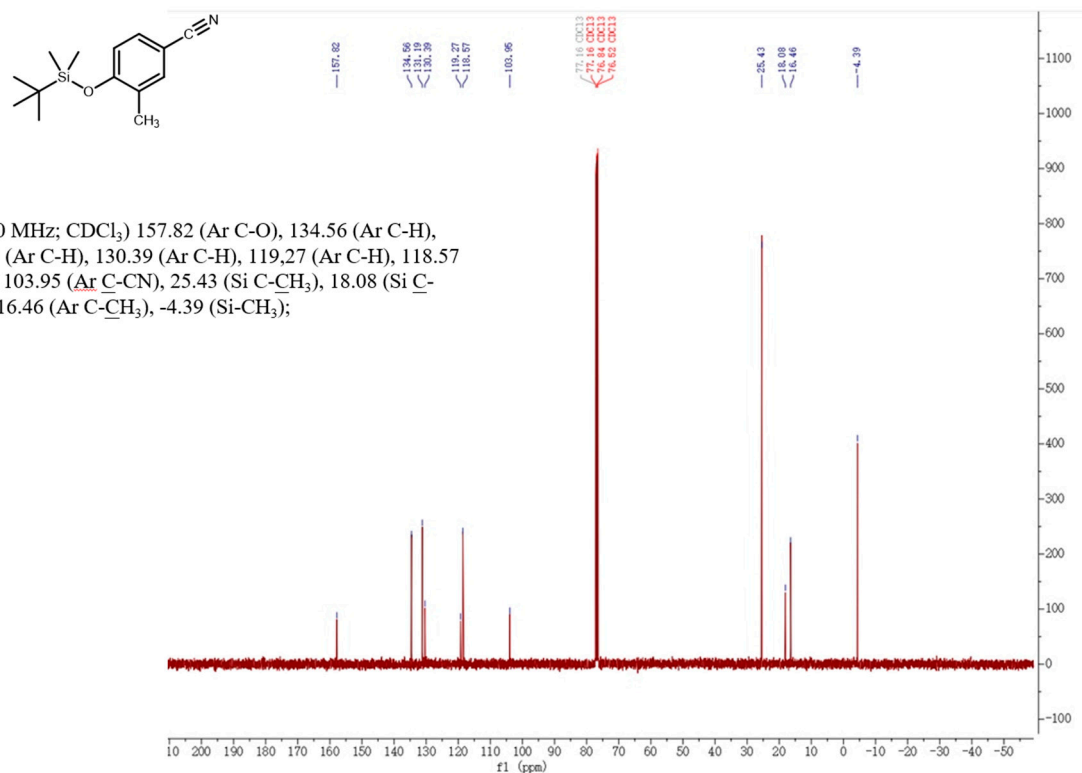

**Figure S12.** Calibrated NMR spectra for **8** showing  $^1H$  (top) and  $^{13}C$  (bottom) chemical shifts.

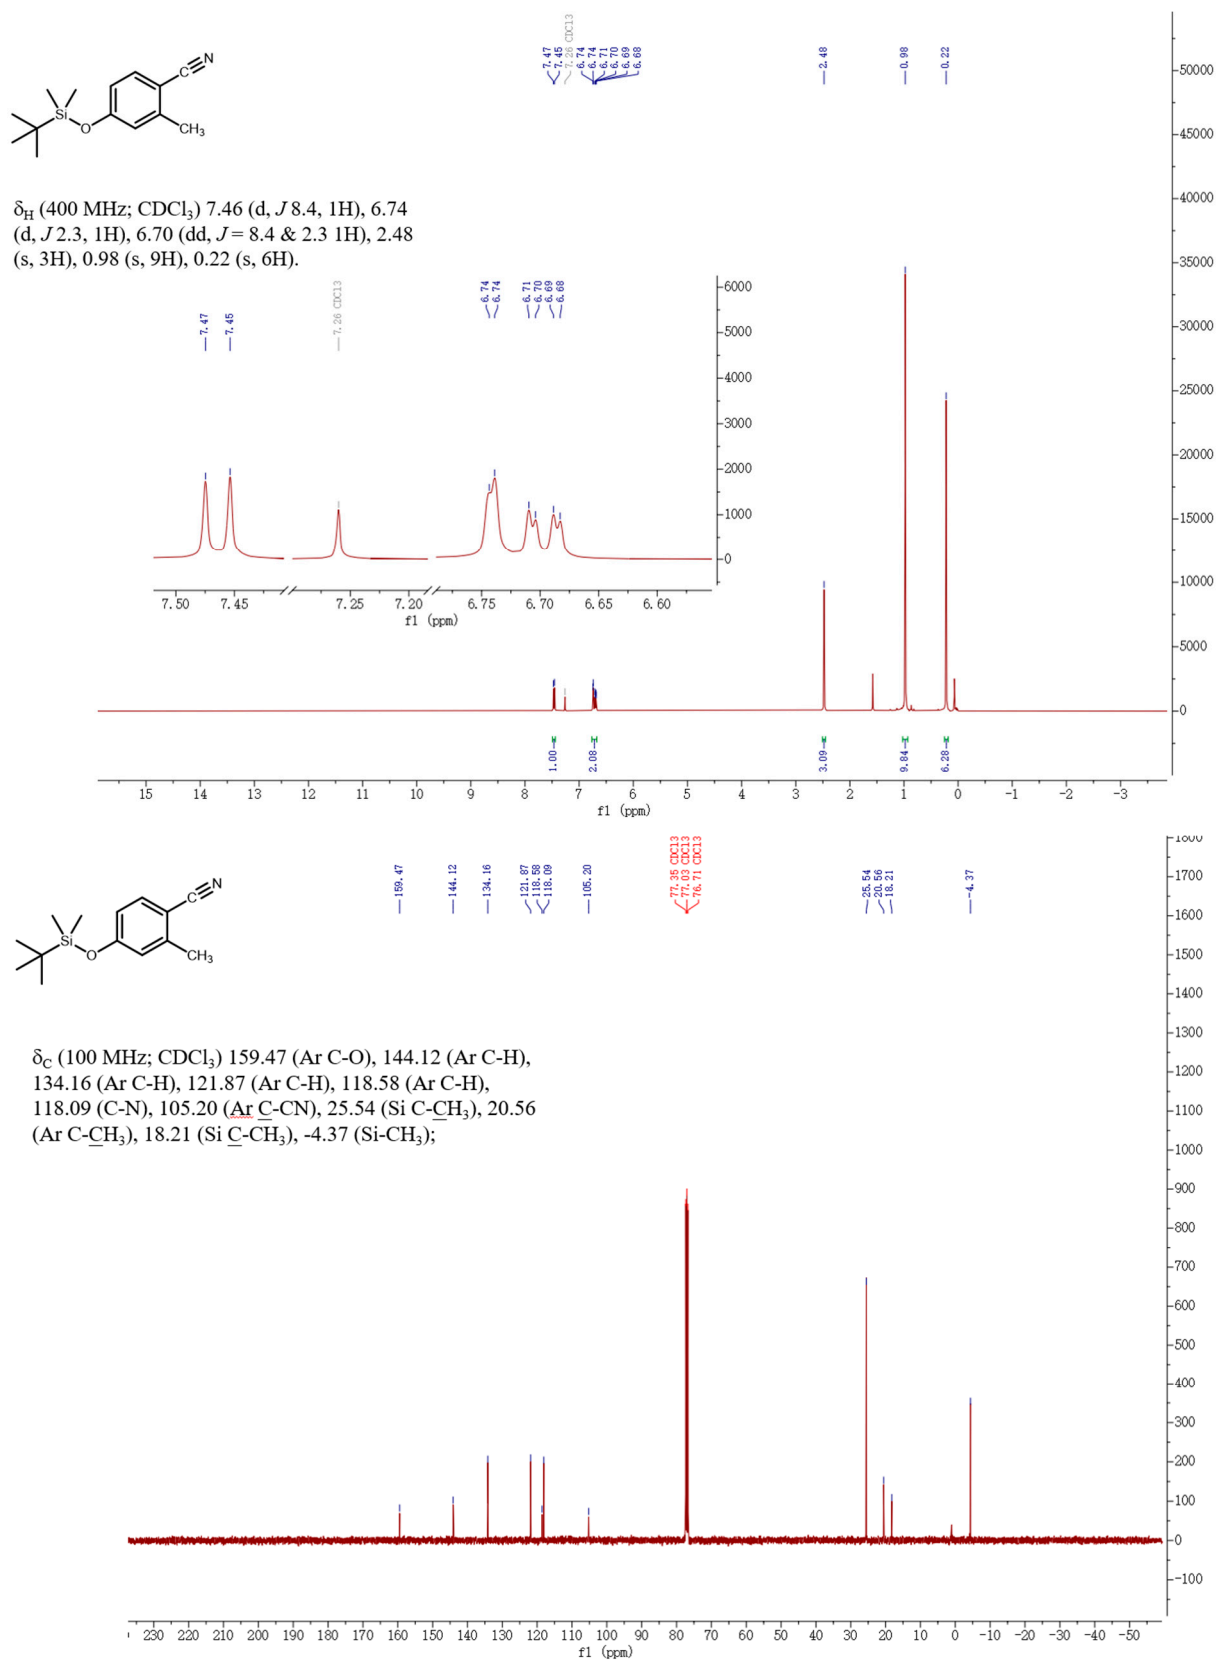

**Figure S13.** Calibrated NMR spectra for **9** showing <sup>1</sup>H (top) and <sup>13</sup>C (bottom) chemical shifts.



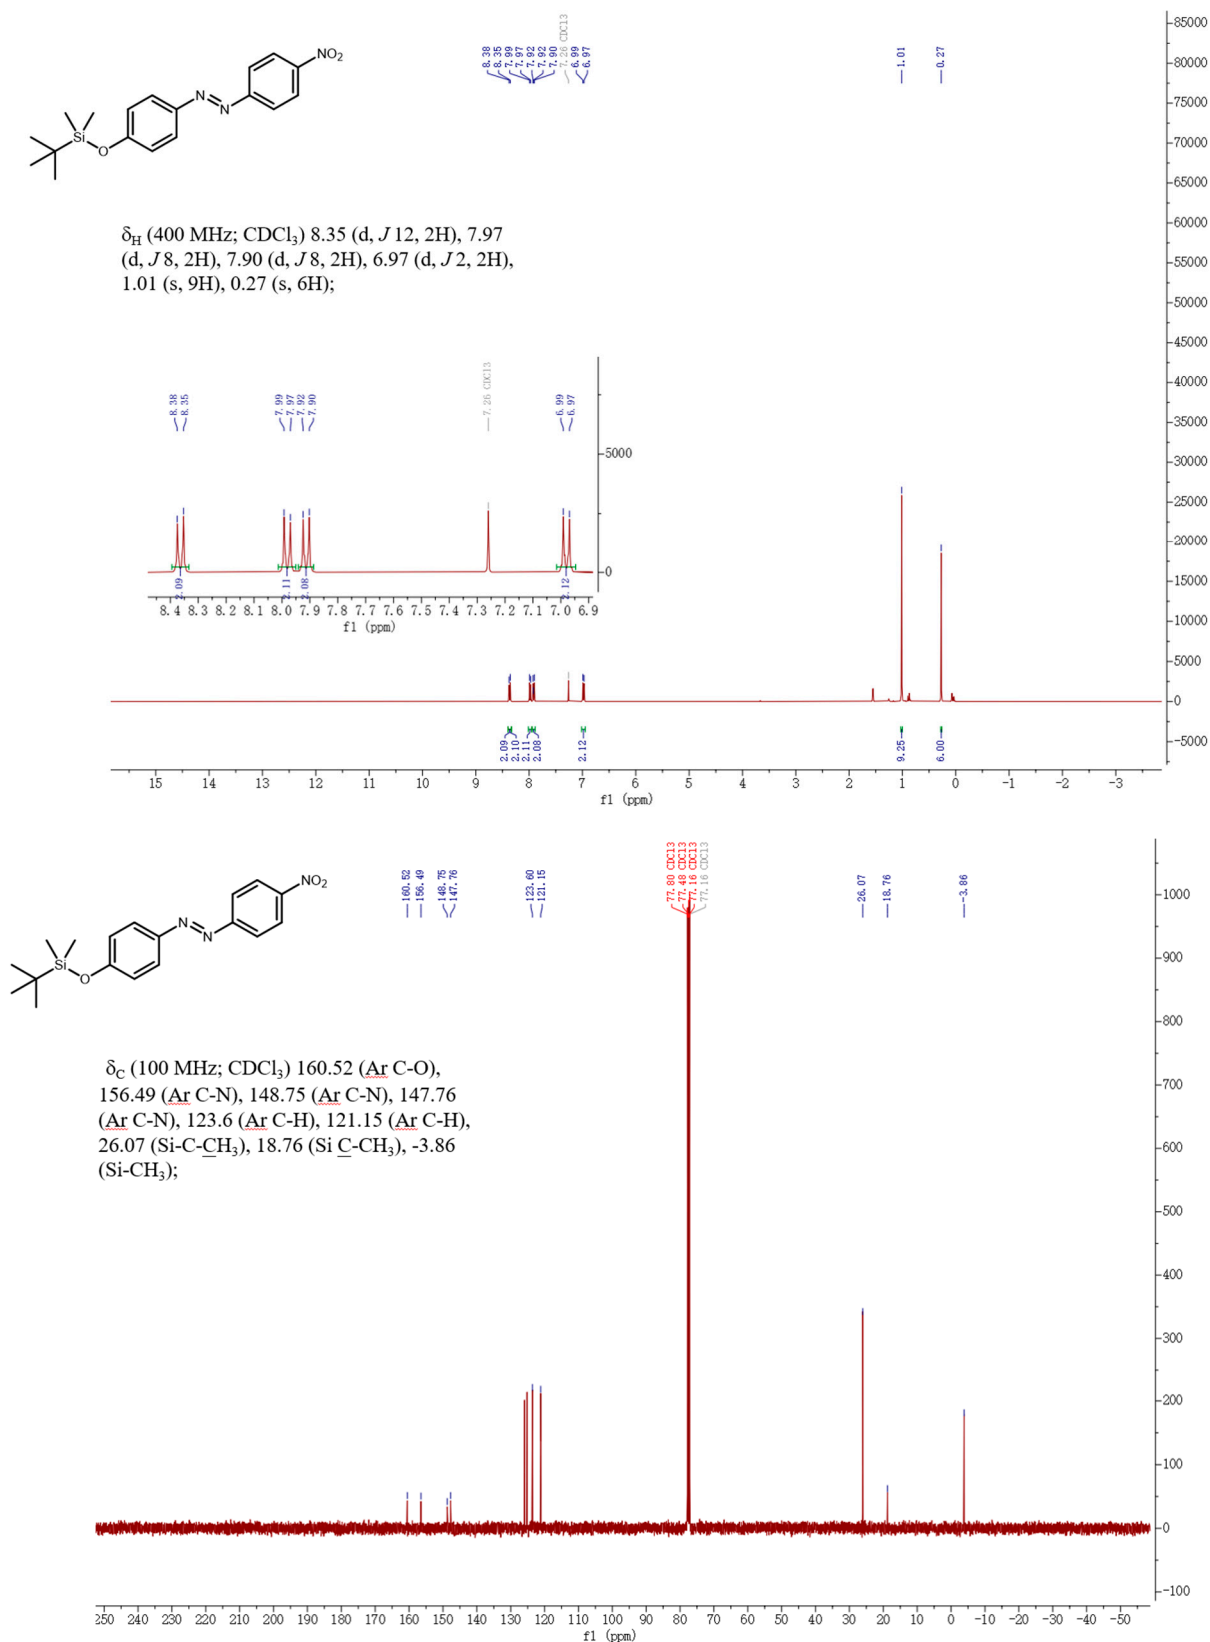

**Figure S14.** Calibrated NMR spectra for **10** showing <sup>1</sup>H (top) and <sup>13</sup>C (bottom) chemical shifts.

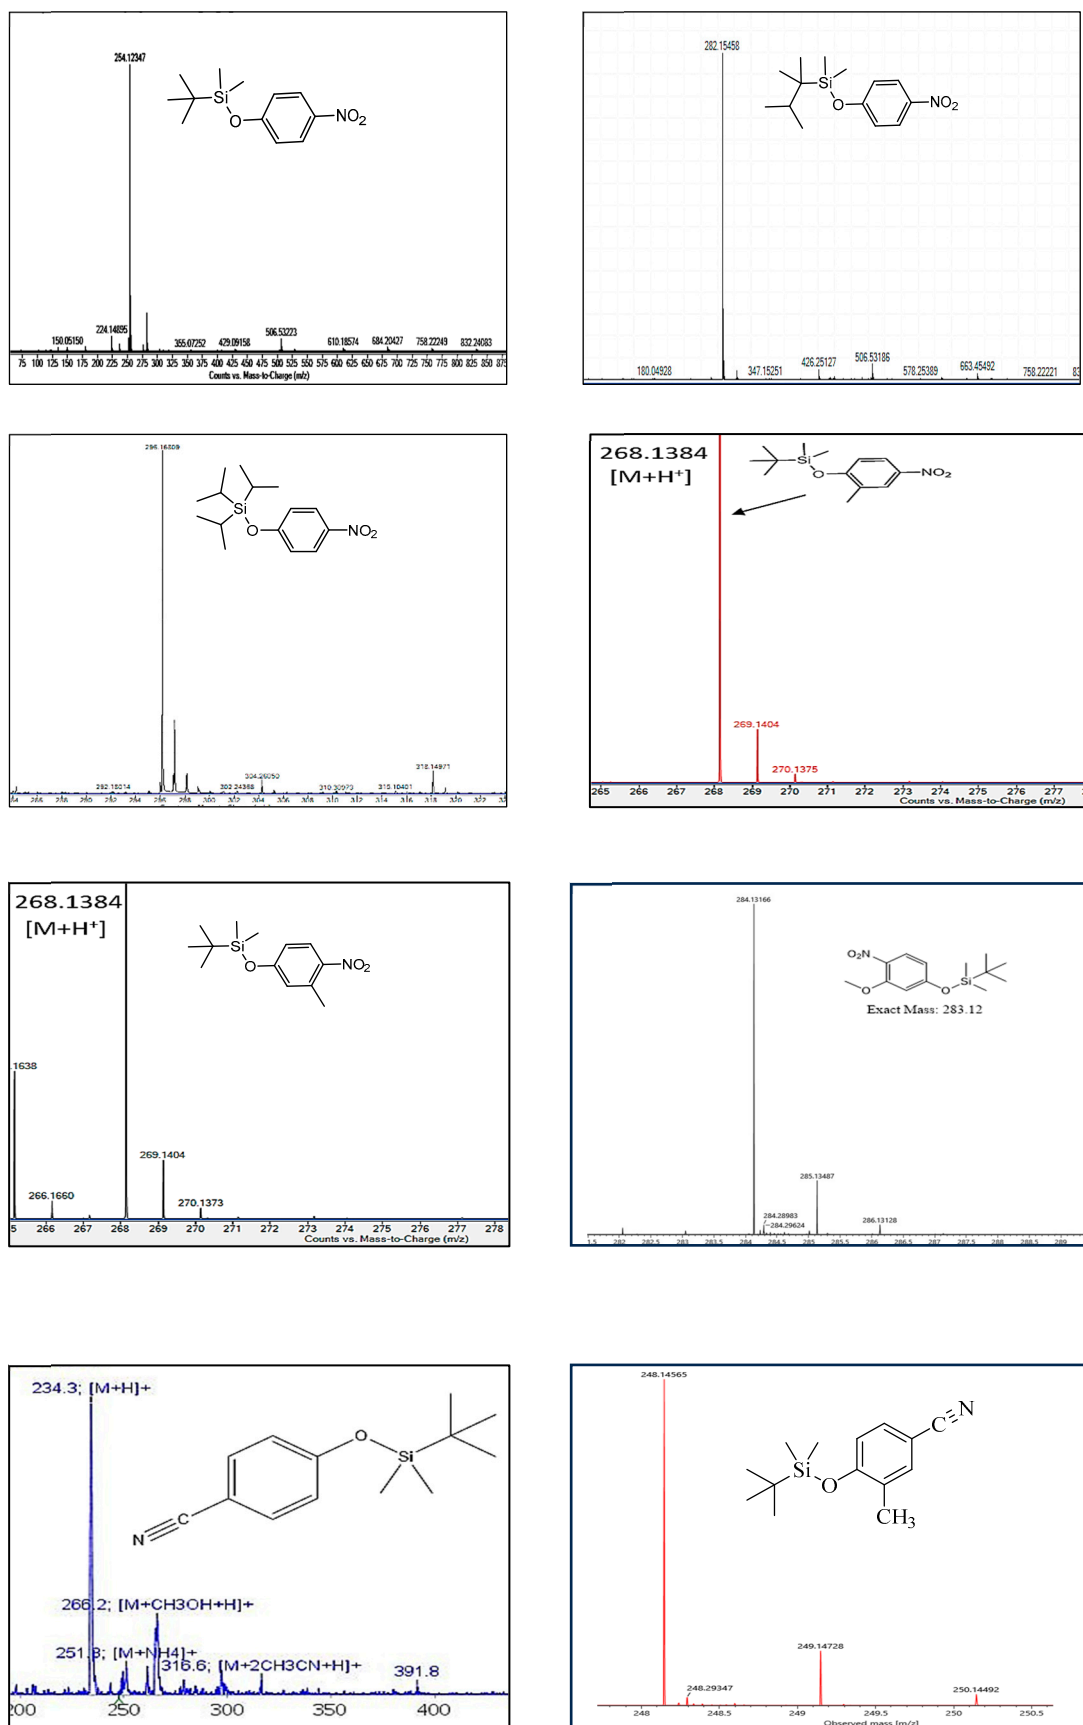

**Figure S15.** ESI+ mass spectra of substrates 1-10.

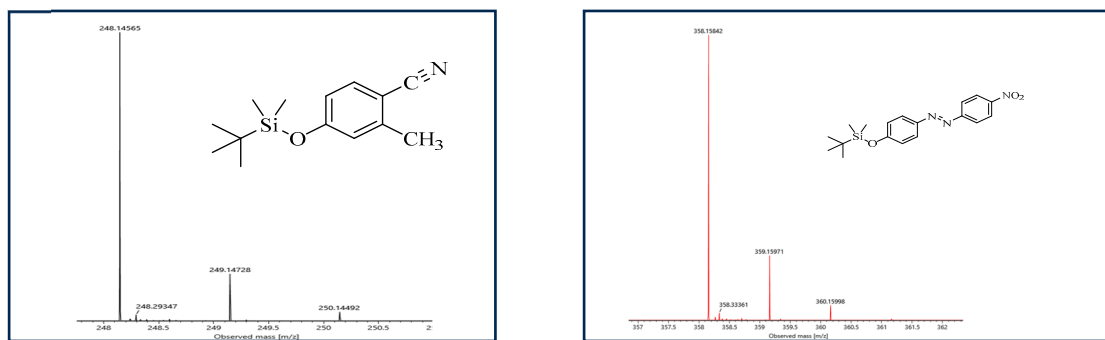

**Figure S15 (continued).** ESI+ mass spectra of substrates **1-10**.
